# Supplementary material
Source: Royal Society of Chemistry journal article supplement (doi:10.1039/d6dt00512h)
Supplement: d6dt00512h1.pdf [file d6dt00512h1.pdf]

## Supporting Information

### **Computational Insights into the Encapsulation of a Dy(III) Bis(Amide)–Alkene Single-Ion Magnet within Porous Frameworks**

Garima Bangar and Gopalan Rajaraman\*

Department of Chemistry, Indian Institute of Technology Bombay, Powai, Mumbai 400076, India. Tel: (+91)-22-2576-7183. Email: [rajaraman@chem.iitb.ac.in](mailto:rajaraman@chem.iitb.ac.in)

Periodic DFT (pDFT) calculations were performed using CP2K<sup>1</sup> and VASP<sup>2</sup> within the PBE exchange–correlation functional including D3 dispersion correction (Becke–Johnson damping).<sup>3, 4</sup> In CP2K, the GAPW formalism was employed with DZVP-MOLOPT-GTH basis sets and GTH pseudopotentials, using a plane-wave cutoff of 400 Ry. In VASP, the PAW method with a plane-wave cutoff of 520 eV was employed, along with an electronic convergence criterion of 10<sup>-5</sup> eV and a force convergence threshold of 0.02 eV Å<sup>-1</sup>. For computational efficiency and to avoid complications arising from 4f electrons in periodic calculations, the Dy<sup>3+</sup> centres were replaced by isostructural Y<sup>3+</sup> ions in the VASP simulations.

All the ab initio calculations have been performed by the post-Hartree-Fock–Fock *ab initio* calculations by using the MOLCAS 8.2 code.<sup>5</sup> Basis sets for all atoms were taken from the ANO-RCC library as implemented in the MOLCAS package (Table S1).

**Table S1.** List of the used ANO-RCC basis sets.

| Element | Basis Sets              |
|---------|-------------------------|
| Dy      | ANO-RCC...8s7p5d3f2g1h. |
| C       | ANO-RCC...3s2p1d        |
| H       | ANO-RCC...2s1p.         |
| Si      | ANO-RCC...4s3p1d.       |
| N       | ANO-RCC...3s2p1d.       |
| Cl      | ANO-RCC...4s3p1d.       |

All the calculations were carried out using complete active space (CAS). In the case of Dy, the active space comprised nine active Dy<sup>III</sup> electrons in the seven 4f active orbitals RAS (9,7). The ground-state f-electron configuration for Dy<sup>III</sup> is found to be 4f<sup>9</sup>, which yields a <sup>6</sup>H<sub>15/2</sub> multiplet as the ground state. The CASSCF calculations were performed with the same basis sets and active spaces to obtain relative energies of the Kramers doublets (KDs), g tensors. For Dy<sup>III</sup>, we used 21 roots in the sextet state in the configuration interaction (CI) procedure. Once these spin-free excited states are obtained, we mixed all of these states by using the RASSI-SO module to compute the spin-orbit coupled states. We obtained eight low-lying KDs for the Dy<sup>III</sup> ion, which finally yielded g-tensors.

David P. Mills and co-workers originally synthesised complex **1**.<sup>6</sup> *Ab initio* CASSCF<sup>7</sup> calculations were first performed on both crystallographically resolved components of the X-ray structure (major and minor occupancies)(Figure S1, S6a, S6b), as well as on the fully optimised isolated cation (**1**<sup>+</sup>), and two independently optimised models incorporating a proximal counteranion, namely **1**<sub>Cl</sub> and **1**<sub>Al(OCF<sub>3</sub>)<sub>4</sub></sub>, each considered separately to ensure charge neutrality (Figure S2b/c).

## Structural Models and Optimised Geometries

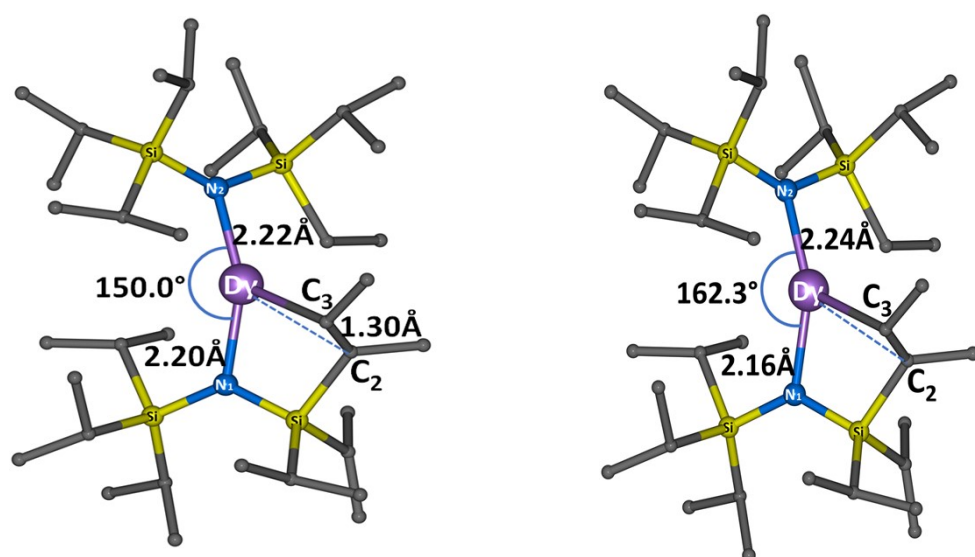

**Figure S1:** Crystal structure of  $1_{xray}$ . The left side represents the major structure, and the right side is the minor structure according to the experiment.

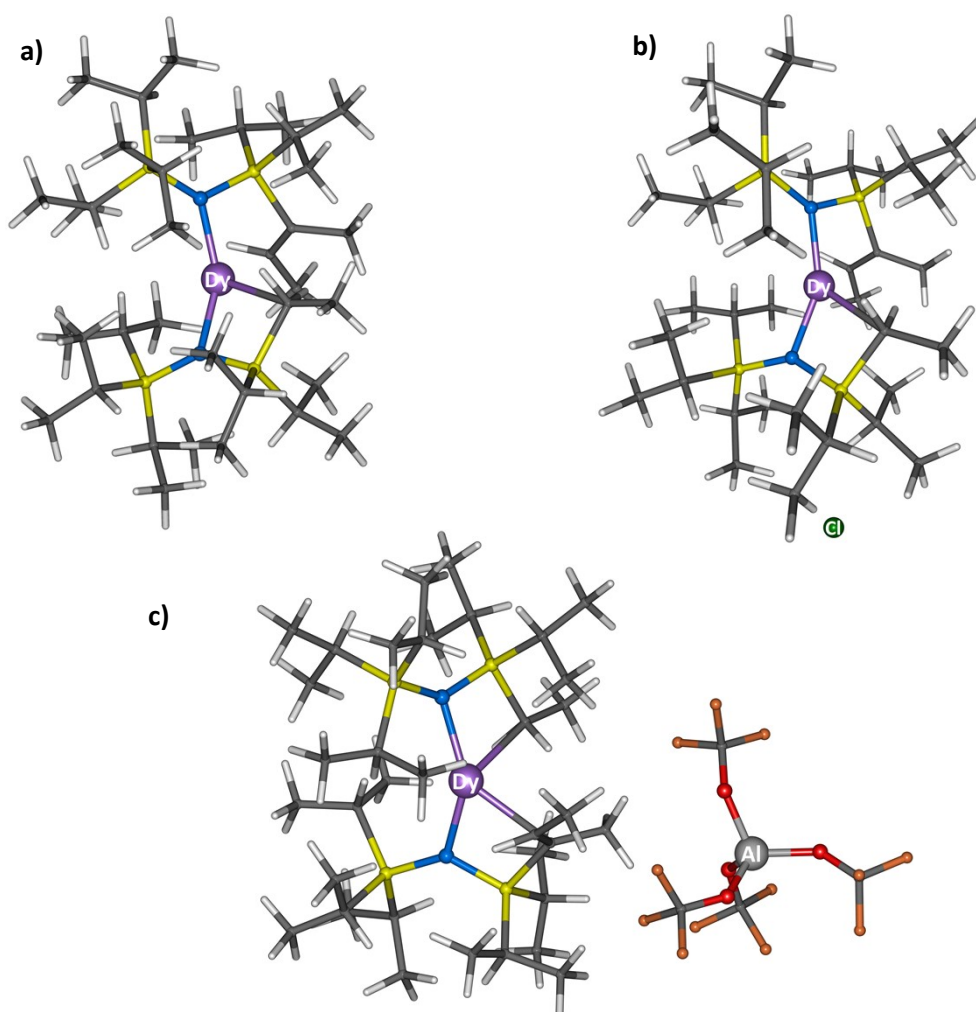

**Figure S2:** Optimised molecular structure of Dy complex a)  $1^+$ , b)  $1_{Cl}$  and c)  $1_{Al(OCF_3)_4}$ . Colour Code: Dy- Purple, N-Blue, Si-Yellow, C-Grey, Al-Light Grey, H-White, O-Red, F- Orange and Cl-Green.

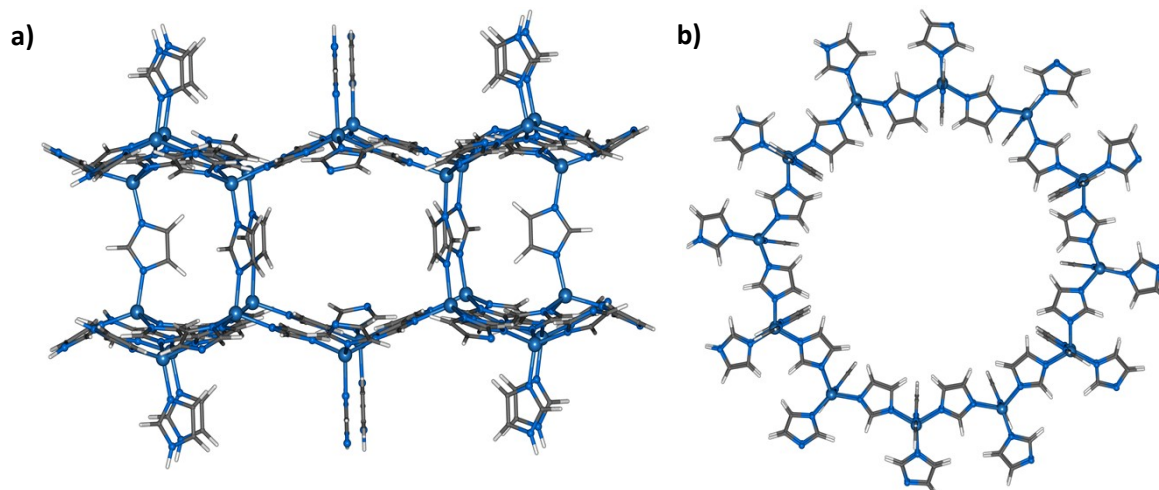

**Figure S3:** Unit cell of AFI-[Zn(Im)<sub>2</sub>] (F1) a) front view, and b) top view. Colour code: Zn: dark blue, N: Blue, C- grey and H- white.

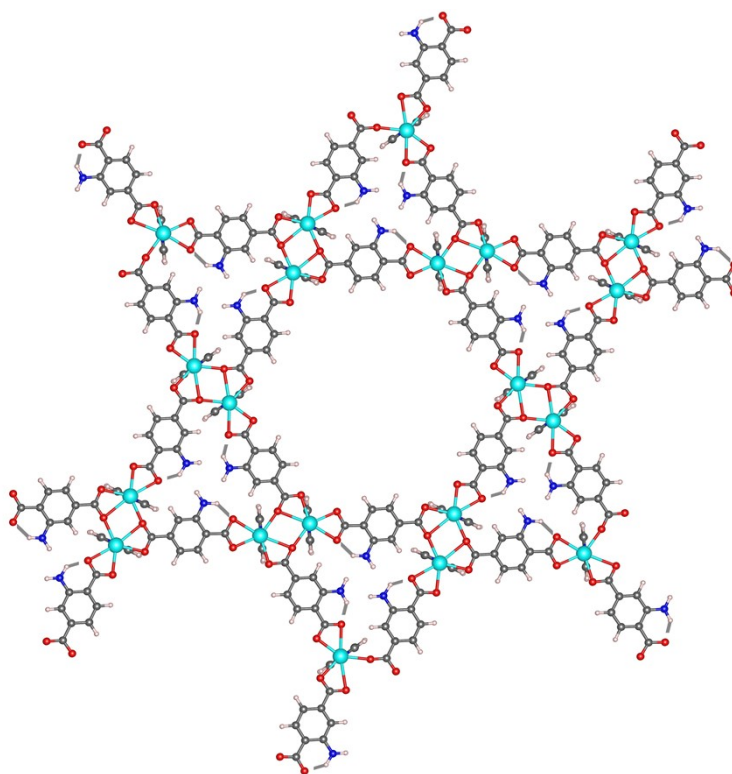

**Figure S4:** Unit cell of Cd-MOF (F2). Colour code: Cd-Cyan Blue, O-Red, N- Blue, C- grey, and H- white.

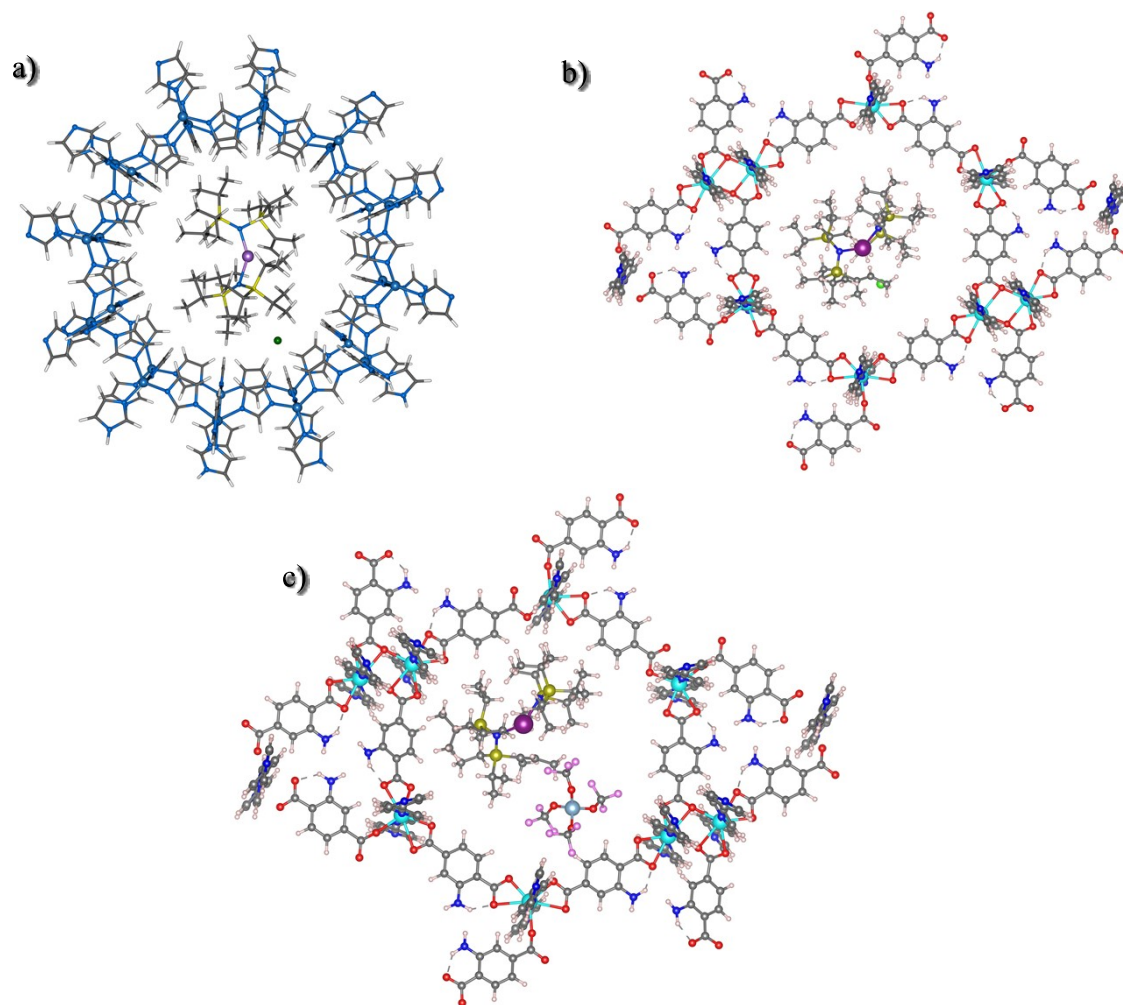

Figure S5: Optimised geometry of a)  $1_{Cl}@F1$ ,  $1_{Cl}@F2$  and  $1_{Al(OCF_3)_4}@F2$ .

### Magnetic Anisotropy Data

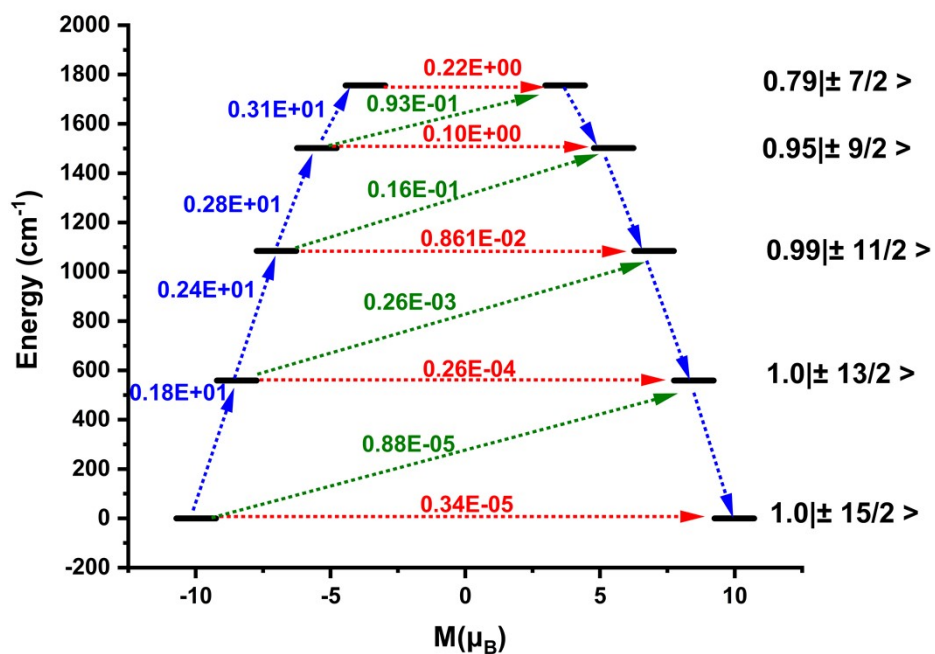

Figure S6a: *Ab initio* computed magnetisation blockade barriers for  $1_{x\text{-ray(major)}}$

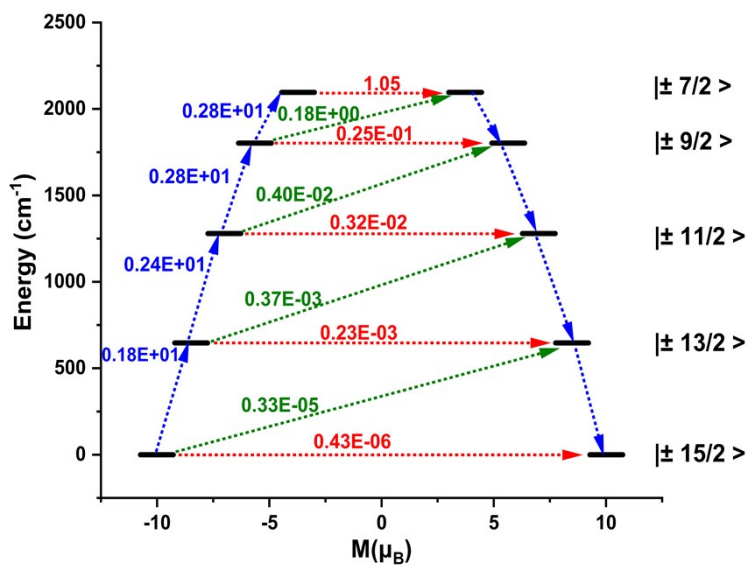

Figure S6b: *Ab initio* computed magnetisation blockade barriers for  $1_{x\text{-ray(minor)}}$

**Table S2.** CASSCF+RASSI-SO computed energies of KDs and SINGLE\_ANISO computed g-tensors of  $\mathbf{1}_x$ ,  $\mathbf{1}_y$ ,  $\mathbf{1}_z$ ,  $\mathbf{1}^+$ , and  $\mathbf{1}_{Cl}$

| KDs                                          | E(cm <sup>-1</sup> ) | $g_x$  | $g_y$ | $g_z$  | $\vartheta$ |
|----------------------------------------------|----------------------|--------|-------|--------|-------------|
| <b><math>\mathbf{1}_{xray}</math></b>        |                      |        |       |        |             |
| 15/2                                         | 0.0                  | 0.000  | 0.000 | 19.970 | ~           |
| 13/2                                         | 559.4                | 0.000  | 0.000 | 16.957 | 0.9         |
| 11/2                                         | 1084.7               | 0.024  | 0.027 | 14.013 | 1.6         |
| 9/2                                          | 1501.7               | 0.302  | 0.322 | 11.327 | 13.5        |
| 7/2                                          | 1755.8               | 0.256  | 0.757 | 9.642  | 39.8        |
| 5/2                                          | 1894.2               | 8.100  | 6.257 | 3.774  | 13.1        |
| 3/2                                          | 1992.7               | 1.137  | 3.241 | 14.645 | 88.0        |
| 1/2                                          | 2027.8               | 0.575  | 1.094 | 19.288 | 91.1        |
| <b><math>\mathbf{1}^+</math></b>             |                      |        |       |        |             |
| 15/2                                         | 0.0                  | 0.000  | 0.000 | 19.822 | ~           |
| 13/2                                         | 501.1                | 0.001  | 0.001 | 16.812 | 0.5         |
| 11/2                                         | 959.3                | 0.062  | 0.071 | 13.893 | 3.2         |
| 9/2                                          | 1315.7               | 0.631  | 0.651 | 11.212 | 15.3        |
| 7/2                                          | 1544.2               | 0.497  | 1.508 | 8.393  | 34.2        |
| 5/2                                          | 1676.6               | 3.991  | 5.936 | 8.647  | 94.1        |
| 3/2                                          | 1770.8               | 1.296  | 2.335 | 15.168 | 84.2        |
| 1/2                                          | 1790.8               | 0.621  | 1.191 | 19.205 | 94.4        |
| <b><math>\mathbf{1}_{Cl}</math></b>          |                      |        |       |        |             |
| 15/2                                         | 0.0                  | 0.000  | 0.000 | 20.003 | ~           |
| 13/2                                         | 553.8                | 0.002  | 0.002 | 17.024 | 2.1         |
| 11/2                                         | 1062.0               | 0.014  | 0.015 | 14.135 | 0.9         |
| 9/2                                          | 1461.1               | 0.275  | 0.317 | 11.484 | 7.9         |
| 7/2                                          | 1695.9               | 2.367  | 3.288 | 10.018 | 36.9        |
| 5/2                                          | 1796.4               | 0.381  | 3.291 | 12.682 | 69.5        |
| 3/2                                          | 1861.3               | 0.101  | 1.985 | 6.599  | 70.2        |
| 1/2                                          | 1920.2               | 12.469 | 8.624 | 1.232  | 16.6        |
| <b><math>\mathbf{1}_{Al(OCF_3)_4}</math></b> |                      |        |       |        |             |
| 15/2                                         | 0.0                  | 0.000  | 0.000 | 19.914 | ~           |
| 13/2                                         | 475.2                | 0.002  | 0.002 | 16.912 | 0.6         |
| 11/2                                         | 903.9                | 0.072  | 0.085 | 13.963 | 4.7         |
| 9/2                                          | 1237.8               | 0.413  | 0.450 | 11.202 | 16.5        |
| 7/2                                          | 1462.9               | 1.310  | 2.307 | 8.470  | 32.0        |
| 5/2                                          | 1600.8               | 8.657  | 7.209 | 3.626  | 2.5         |
| 3/2                                          | 1725.8               | 0.812  | 1.388 | 16.206 | 85.1        |
| 1/2                                          | 1781.6               | 0.136  | 0.254 | 19.630 | 95.4        |

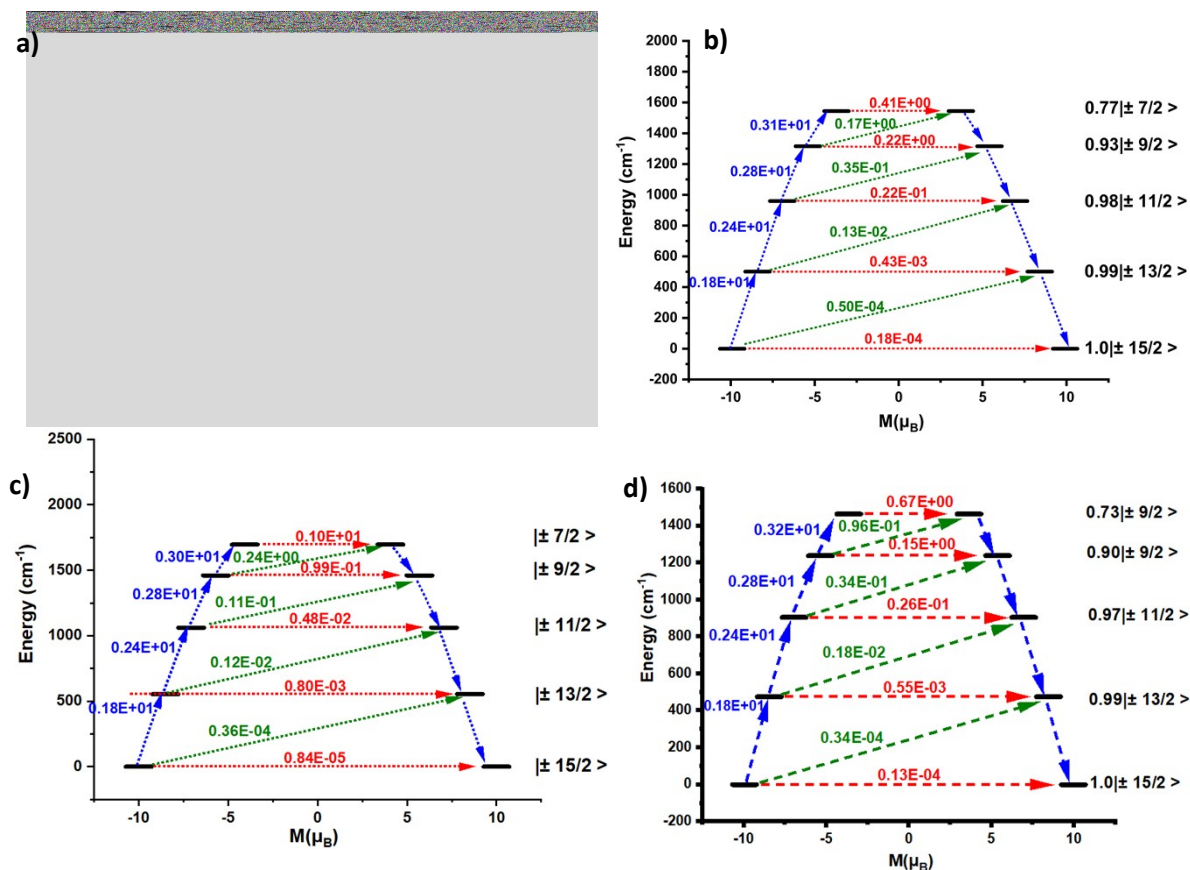

Figure S7: *Ab initio* computed magnetisation blockade barriers for a)  $1_{x\text{-ray}}$ , b)  $1^+$ , c)  $1_{Cl}$ , and  $1_{Al(OCF_3)_4}$

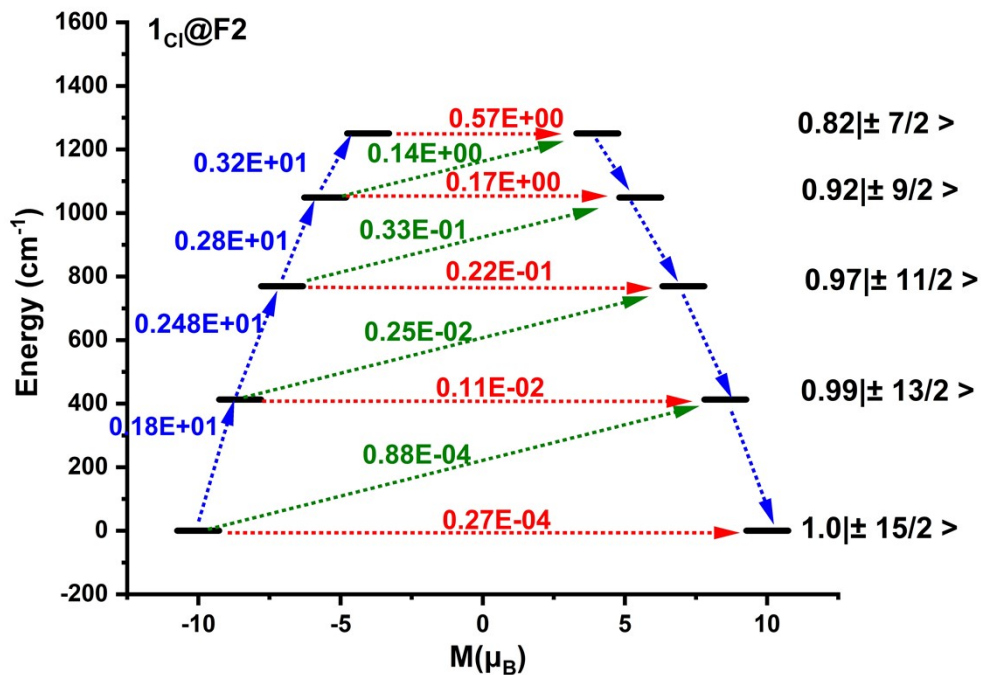

Figure S8: *Ab initio* computed magnetisation blockade barriers for  $1_{Cl@F2}$ .

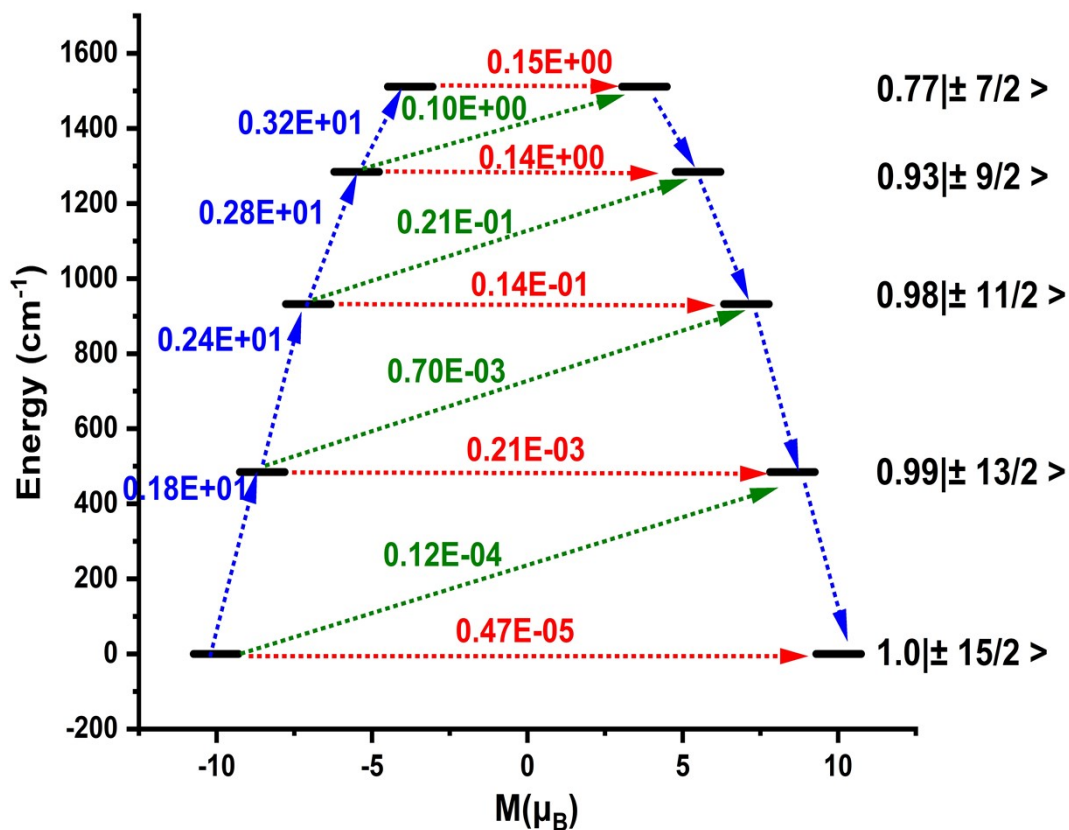

Figure S9: *Ab initio* computed magnetisation blockade barriers for  $\mathbf{1}_{\text{Al}(\text{OCF}_3)_4@F2}$ .

Table S3. CASSCF+RASSI-SO computed energies of all low-lying KDs, and SINGLE\_ANISO computed  $g$ -tensors of  $\mathbf{1}_{\text{Cl}@F1}$

| KDs                         | E(cm <sup>-1</sup> ) | $g_x$ | $g_y$  | $g_z$  | $\vartheta$ |
|-----------------------------|----------------------|-------|--------|--------|-------------|
| $\mathbf{1}_{\text{Cl}@F1}$ |                      |       |        |        |             |
| 1                           | 0.0                  | 0.000 | 0.000  | 19.921 | ~           |
| 2                           | 489.6                | 0.000 | 0.000  | 16.942 | 0.3         |
| 3                           | 935.7                | 0.042 | 0.048  | 14.020 | 3.3         |
| 4                           | 1283.2               | 0.299 | 0.315  | 11.313 | 15.2        |
| 5                           | 1507.7               | 0.078 | 0.088  | 9.083  | 34.8        |
| 6                           | 1640.9               | 1.102 | 1.1832 | 8.924  | 8.4         |
| 7                           | 1750.8               | 1.310 | 2.056  | 3.633  | 96.4        |
| 8                           | 1816.6               | 0.824 | 4.082  | 15.941 | 81.2        |
| $\mathbf{1}_{\text{Cl}@F2}$ |                      |       |        |        |             |
| 1                           | 0.0                  | 0.000 | 0.000  | 20.010 | ~           |

|                                                       |        |       |       |        |       |
|-------------------------------------------------------|--------|-------|-------|--------|-------|
| 2                                                     | 412.9  | 0.003 | 0.003 | 17.061 | 0.3   |
| 3                                                     | 769.2  | 0.062 | 0.071 | 14.144 | 4.3   |
| 4                                                     | 1048.6 | 0.508 | 0.530 | 11.348 | 12.5  |
| 5                                                     | 1250.7 | 1.312 | 1.941 | 8.748  | 23.4  |
| 6                                                     | 1383.9 | 3.965 | 4.534 | 8.488  | 69.4  |
| 7                                                     | 1476.3 | 1.653 | 3.433 | 14.395 | 89.2  |
| 8                                                     | 1579.5 | 0.242 | 0.691 | 18.973 | 100.3 |
| <b>1<sub>Al(OCF<sub>3</sub>)<sub>4</sub>@F2</sub></b> |        |       |       |        |       |
| 1                                                     | 0      | 0.000 | 0.000 | 20.027 | ~     |
| 2                                                     | 484.4  | 0.000 | 0.000 | 17.064 | 0.5   |
| 3                                                     | 932.16 | 0.039 | 0.044 | 14.125 | 3.7   |
| 4                                                     | 1284.0 | 0.405 | 0.421 | 11.356 | 14.6  |
| 5                                                     | 1510.9 | 0.047 | 0.635 | 9.000  | 33.3  |
| 6                                                     | 1638.3 | 8.408 | 6.534 | 3.951  | 4.9   |
| 7                                                     | 1732.5 | 1.212 | 2.598 | 15.427 | 87.9  |
| 8                                                     | 1784.1 | 0.187 | 0.321 | 19.670 | 92.6  |

**Table S4.** Atoms In Molecules (AIM) analysis for **1<sub>x-ray(major)</sub>**

| Critical Points index | Interaction          | $\rho(r)$ (a.u.) | $\nabla^2\rho(r)$ (a.u.) | $H(r)$ (a.u.) | Nature                         |
|-----------------------|----------------------|------------------|--------------------------|---------------|--------------------------------|
| <b>241</b>            | Dy–C (strong)        | 0.2417           | –0.57497                 | –0.20561      | Strong Dy–C bond               |
| <b>266</b>            | Dy–C (moderate)      | 0.03436          | +0.01075                 | +0.00060      | Closed-shell Dy–C              |
| <b>206</b>            | Dy–C (moderate)      | 0.02191          | +0.00914                 | +0.00064      | Closed-shell Dy–C              |
| <b>233</b>            | Dy–C (weak–moderate) | 0.01118          | +0.03324                 | –0.00078      | Ionic Dy–C                     |
| <b>205</b>            | Dy…Si (moderate)     | 0.03448          | +0.01167                 | +0.00066      | Electrostatic Dy–Si            |
| <b>249</b>            | Dy…Si (weak)         | 0.01313          | +0.04684                 | +0.00123      | Electrostatic Dy–Si            |
| <b>180</b>            | Dy…H                 | 0.00224          | +0.00644                 | +0.00035      | Anagostic / borderline agostic |

## Binding Energy Analysis

Encapsulation of **1<sub>Cl</sub>** was evaluated in both **F1** and **F2**, whereas the bulky counteranion system **1<sub>Al(OCF<sub>3</sub>)<sub>4</sub></sub>** was investigated only in **F2**. The aluminate counteranion was not considered in the **F1**, as structural optimisation of **1<sub>Cl</sub>@F1** did not indicate significant equatorial perturbation or reduction of axiality. Counteranion effects were therefore examined specifically in the Cd-MOF system, where chloride-induced distortion was observed. Binding energies were computed using:

$$\Delta E = \{E_{1_{Cl}/Al(OCF_3)_4 @F1/F2}\} - \{E_{F1/F2} + E_{1_{Cl}/Al(OCF_3)_4}\}$$

where,  $\Delta E$  is the binding energy,  $E_{1_{Cl}@F1/F2}$  is the energy of the complex in ZIF/MOF,  $E_{F1/F2}$  is the energy of ZIF/MOF, and  $E_{1_{Cl}/Al(OCF_3)_4}$  is the energy of the optimised geometry of the title complex.

$$\% \text{ Dispersion} = (\Delta E_{D3} - \Delta E_{no D3}) / \Delta E_{D3} \times 100$$

Where:

- $\Delta E_{D3}$  = binding energy with dispersion
- $\Delta E_{no D3}$  = binding energy without dispersion

**Table S5: Binding energy of 1 inside F1 and F2.**

| System                                                | Binding energy ( $\Delta E_{D3}$ ) (kJ.mol <sup>-1</sup> ) | Binding energy ( $\Delta E_{no D3}$ ) (kJ.mol <sup>-1</sup> ) | Dispersion Contribution (%) |
|-------------------------------------------------------|------------------------------------------------------------|---------------------------------------------------------------|-----------------------------|
| <b>1<sub>Cl</sub>@F1</b>                              | -357                                                       | -233.7                                                        | 34.5                        |
| <b>1<sub>Cl</sub>@F2</b>                              | -218.5                                                     | -121.9                                                        | 44                          |
| <b>1<sub>Al(OCF<sub>3</sub>)<sub>4</sub>@F2</sub></b> | -246.2                                                     | -74.6                                                         | 70                          |

**Table S6: Lattice Parameters of 1<sub>Al(OCF<sub>3</sub>)<sub>4</sub>@F2</sub>** with and without cell constraints.

| Lattice Parameters         | 1 <sub>Al(OCF<sub>3</sub>)<sub>4</sub>@F2</sub> - Fixed Cell | 1 <sub>Al(OCF<sub>3</sub>)<sub>4</sub>@F2</sub> - Cell relaxed |
|----------------------------|--------------------------------------------------------------|----------------------------------------------------------------|
| <b>a</b>                   | 11.77745                                                     | 11.76891                                                       |
| <b>b</b>                   | 25.59363                                                     | 25.15379                                                       |
| <b>c</b>                   | 25.59368                                                     | 25.37635                                                       |
| <b><math>\alpha</math></b> | 120.0001                                                     | 119.8671                                                       |
| <b><math>\beta</math></b>  | 90.0000                                                      | 90.9135                                                        |
| <b><math>\gamma</math></b> | 90.0000                                                      | 89.6210                                                        |

**Table S7: Selected structural parameters of 1<sub>Al(OCF<sub>3</sub>)<sub>4</sub>@F2</sub>** with EDIFFG= -0.02 and -0.001 eV.Å<sup>-1</sup>.

| Lattice Parameters | -0.02 | -0.001* |
|--------------------|-------|---------|
| <b>Dy-N1</b>       | 2.229 | 2.230   |
| <b>Dy-N2</b>       | 2.196 | 2.198   |
| <b>N1-Dy-N2</b>    | 144.5 | 144.2   |
| <b>Dy-C1</b>       | 2.751 | 2.755   |
| <b>Dy-C2</b>       | 2.696 | 2.700   |

|              |       |       |
|--------------|-------|-------|
| <b>C1-C2</b> | 1.366 | 1.366 |
|--------------|-------|-------|

\* Selective dynamics have been performed here for  $-0.001 \text{ eV}\cdot\text{\AA}^{-1}$ . The MOF is kept fixed.

### Origin of Host–Guest Stabilisation in **1<sub>Cl</sub>@F2**

To elucidate the nature of host–guest interactions in **1<sub>Cl</sub>@F2**, reduced density gradient (RDG), noncovalent interaction (NCI), and electrostatic potential (ESP) analyses were performed in conjunction with binding energy calculations.

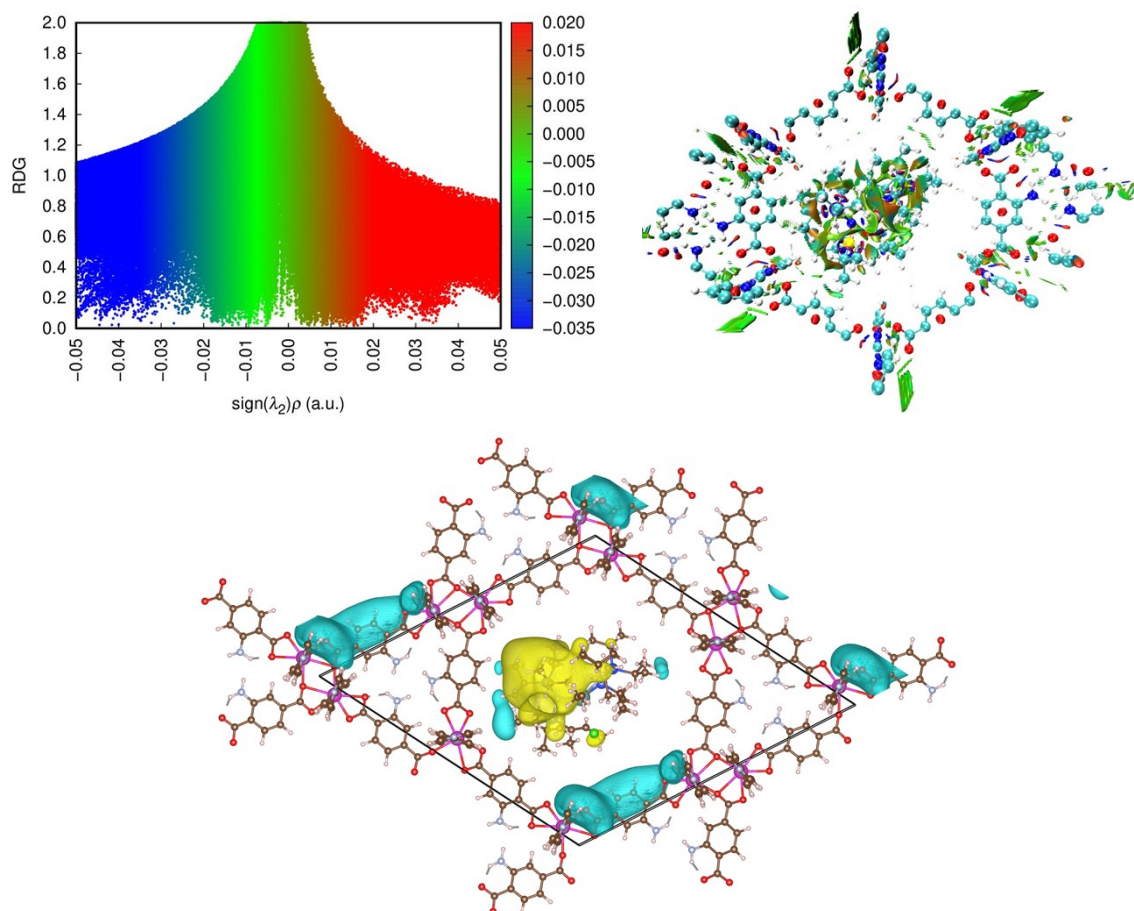

**Figure S10:** a) RDG scatter plot, b) NCI, and c) ESP difference plot for **1<sub>c1</sub>@F2**

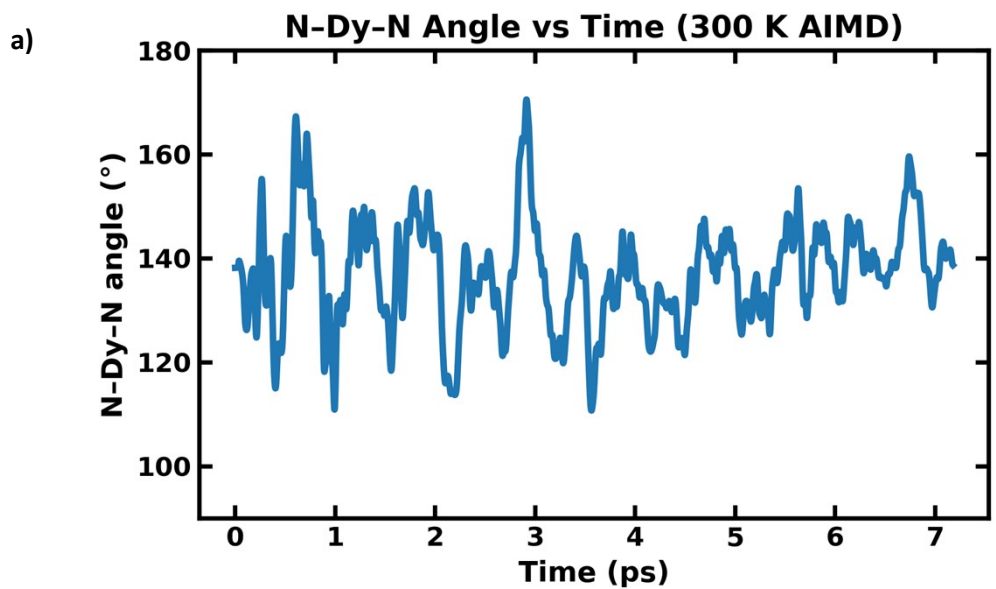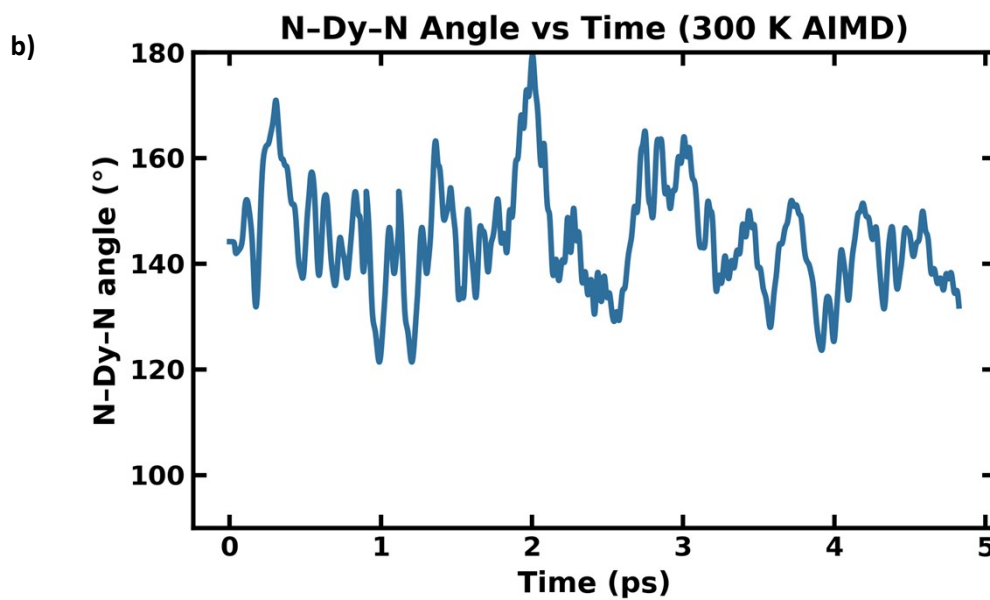

Figure S11: N-Dy-N angle as a function of simulation time at 300 K for a)  $1_{C1}@F2$  and b)  $1_{Al(OCF_3)_4}@F2$ .

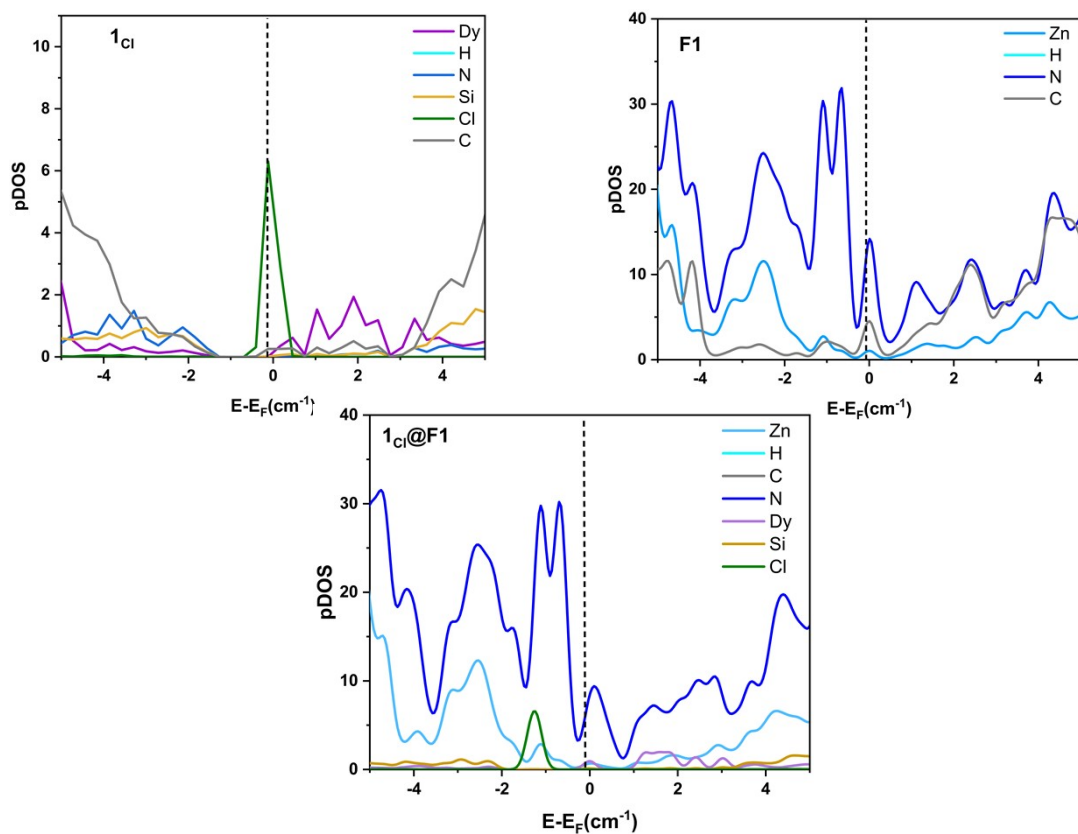

**Figure S12:** Projected Density of states plot for  $1_{\text{Cl}}$ ,  $\text{F1}$  and  $1_{\text{Cl}}@F1$ .

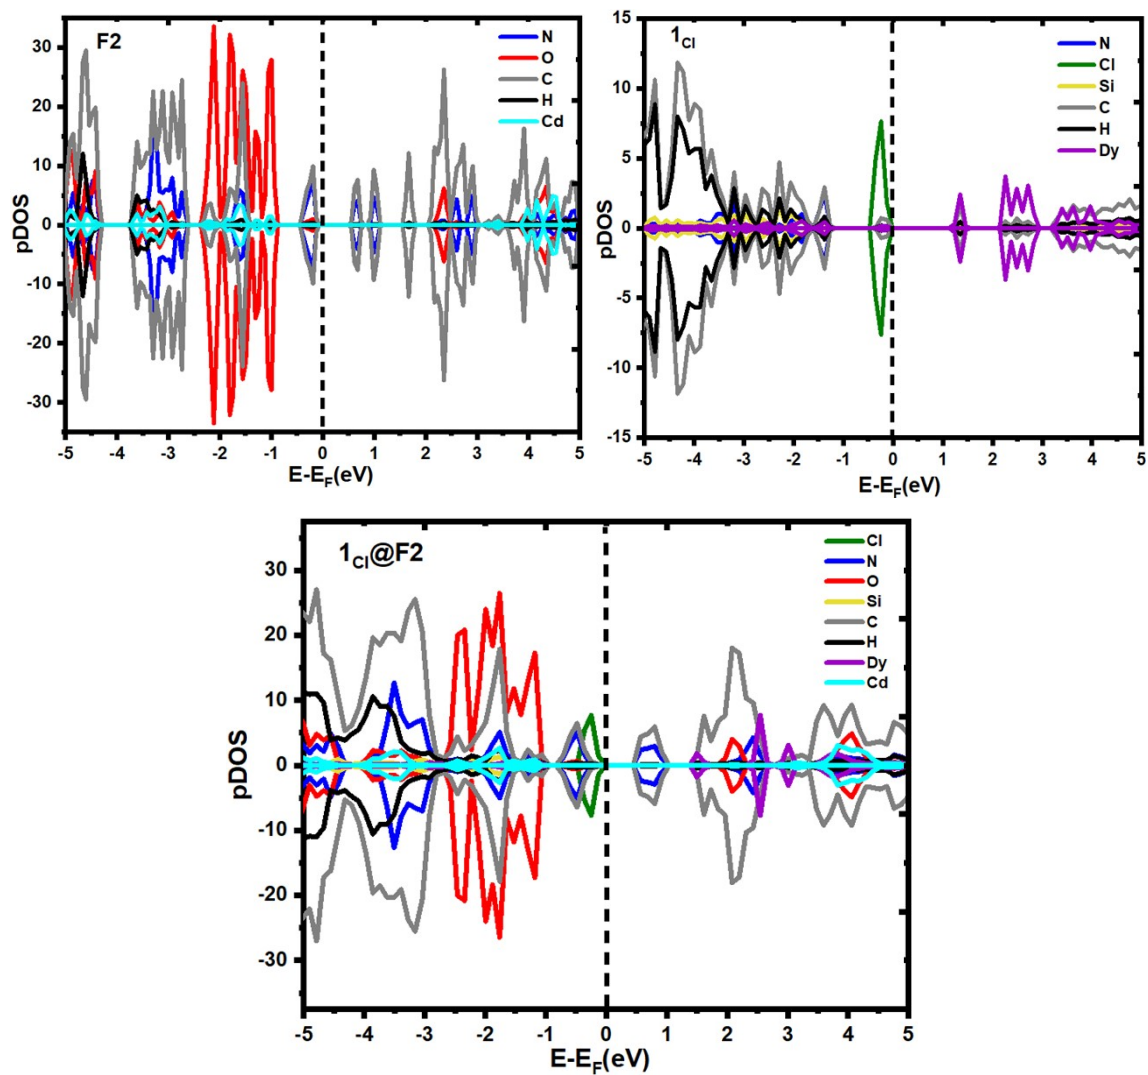

Figure S13: Projected Density of states plot for F2,  $1_{Cl}$ , and  $1_{Cl}@F2$ .

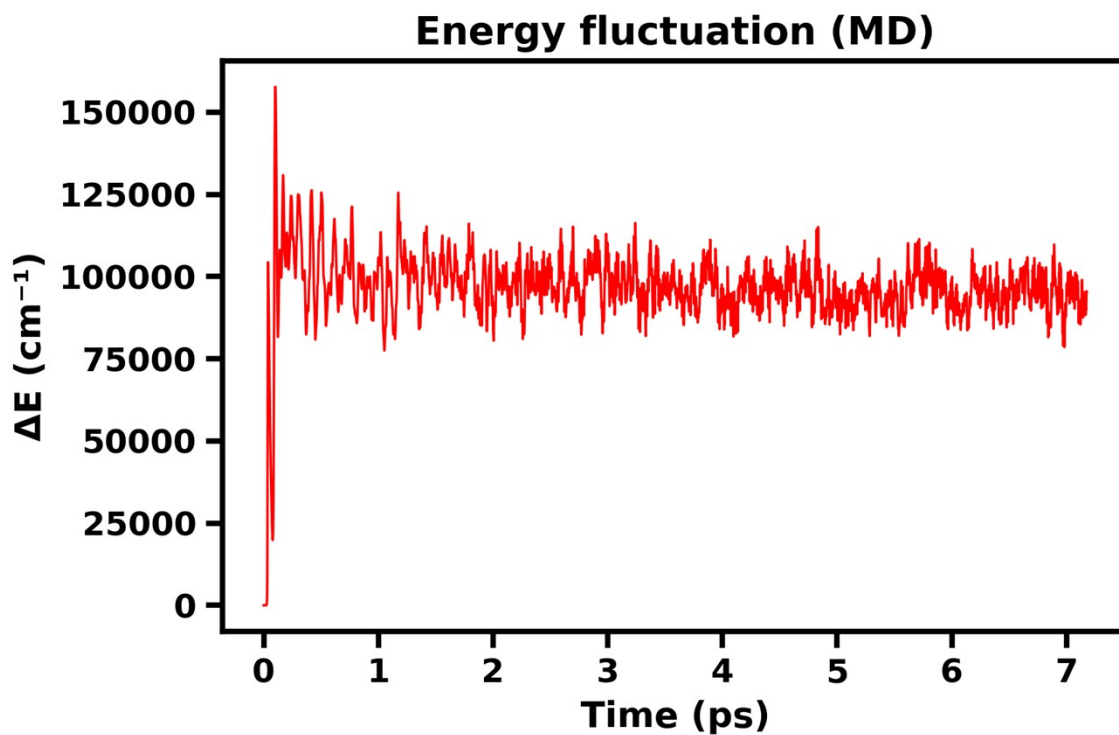

**Figure S14:** Figure X. Time evolution of the energy ( $\Delta E$ , in  $\text{cm}^{-1}$ ) during the AIMD simulation at 300 K for  $1_{\text{c}}@F2$ . The system exhibits an initial equilibration phase followed by stable fluctuations around a constant mean value, indicating thermal stability.

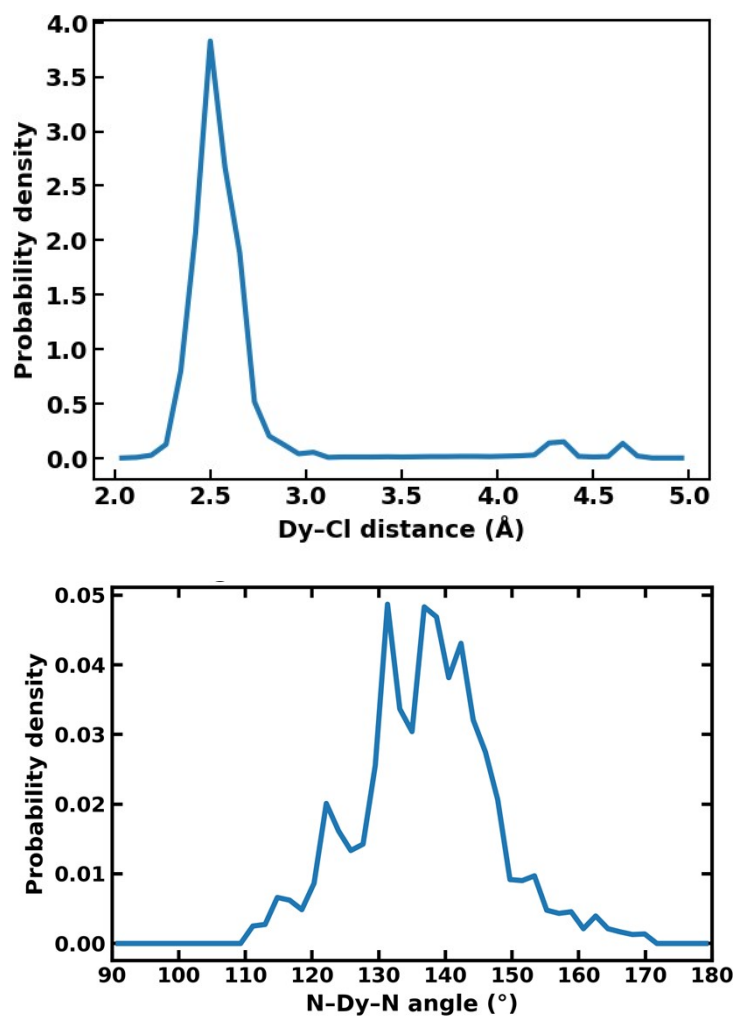

**Figure S15:** Distributions of (top) Dy–Cl distances and (bottom) N–Dy–N angles from AIMD simulations at 300 K for  $1_{\text{Cl}}@F2$ .

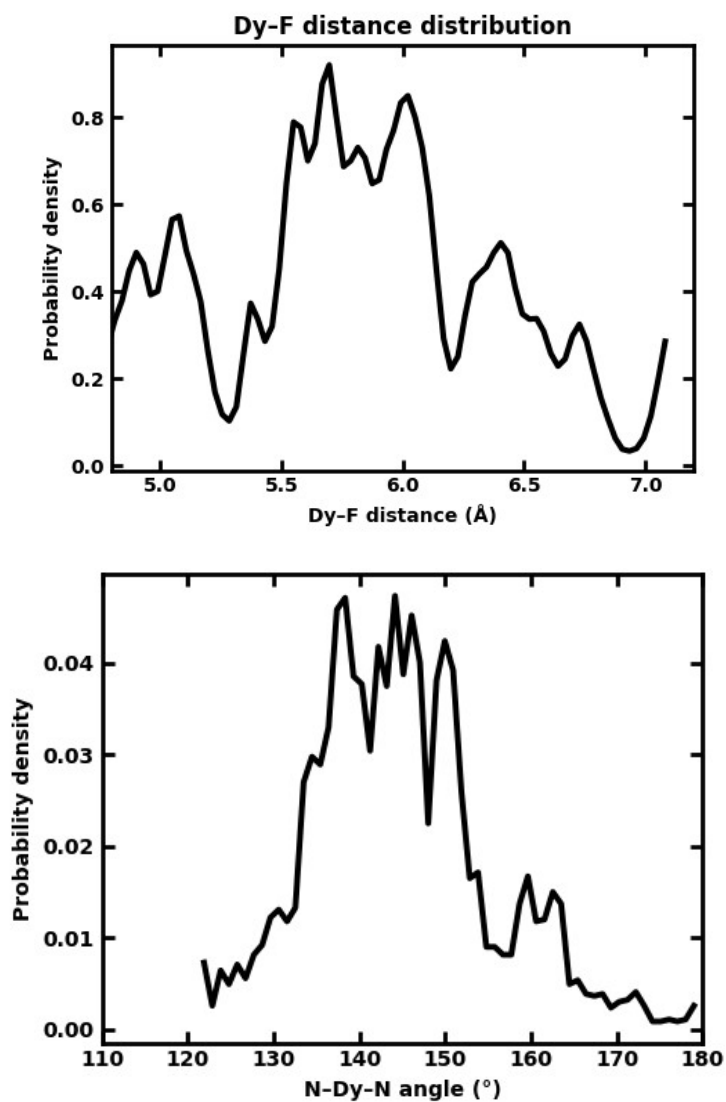

**Figure S16:** Distributions of (top) Dy–F distances and (bottom) N–Dy–N angles from AIMD simulations at 300 K for  $1_{\text{Al}(\text{OCF}_3)_4}@\text{F2}$ .

### Cartesian Coordinates

$1_{\text{xray}}$  (major)

|    |             |              |             |
|----|-------------|--------------|-------------|
| Dy | 4.134380000 | 14.718008000 | 6.083398000 |
| N  | 3.610311000 | 16.738000000 | 5.335794000 |
| N  | 3.517098000 | 12.726798000 | 6.801371000 |
| C  | 6.226761000 | 12.860573000 | 5.871425000 |
| C  | 6.647383000 | 13.780778000 | 6.689686000 |
| H  | 6.115674000 | 13.976655000 | 7.450943000 |
| Si | 3.910732000 | 16.689355000 | 3.644568000 |
| Si | 3.367906000 | 17.986560000 | 6.516461000 |

|    |             |              |             |
|----|-------------|--------------|-------------|
| Si | 4.828709000 | 11.660658000 | 6.536974000 |
| C  | 3.609600000 | 17.023790000 | 8.130191000 |
| H  | 3.028765000 | 16.214476000 | 8.052559000 |
| C  | 4.158029000 | 14.780031000 | 3.375613000 |
| H  | 5.019055000 | 14.515746000 | 3.785656000 |
| H  | 3.439156000 | 14.300754000 | 3.858980000 |
| C  | 4.154117000 | 14.309794000 | 1.914595000 |
| H  | 4.284658000 | 13.338654000 | 1.882890000 |
| H  | 3.295424000 | 14.536845000 | 1.499698000 |
| H  | 4.879478000 | 14.752404000 | 1.426191000 |
| C  | 5.076024000 | 16.488693000 | 8.237317000 |
| H  | 5.325540000 | 16.049001000 | 7.398656000 |
| H  | 5.685126000 | 17.235782000 | 8.410223000 |
| H  | 5.133561000 | 15.843334000 | 8.974071000 |
| C  | 4.727992000 | 19.320249000 | 6.304488000 |
| H  | 5.488971000 | 18.828527000 | 5.880519000 |
| C  | 6.921908000 | 12.487626000 | 4.551722000 |
| H  | 6.421912000 | 11.770677000 | 4.109724000 |
| H  | 6.953303000 | 13.273307000 | 3.965400000 |
| H  | 7.835070000 | 12.183411000 | 4.737209000 |
| C  | 7.918950000 | 14.546939000 | 6.502785000 |
| H  | 8.027823000 | 15.183320000 | 7.240953000 |
| H  | 8.677243000 | 13.926287000 | 6.493189000 |
| H  | 7.885323000 | 15.035114000 | 5.653867000 |
| C  | 5.530369000 | 17.528484000 | 3.138568000 |
| H  | 5.512693000 | 18.456168000 | 3.512302000 |
| C  | 2.515400000 | 17.224452000 | 2.491253000 |
| H  | 2.770059000 | 16.930371000 | 1.569011000 |
| C  | 1.624099000 | 18.679754000 | 6.429848000 |
| H  | 1.513013000 | 19.022642000 | 5.496939000 |
| C  | 5.569634000 | 10.732345000 | 8.002551000 |

|   |             |              |              |
|---|-------------|--------------|--------------|
| H | 4.951628000 | 9.965231000  | 8.175890000  |
| C | 4.488832000 | 10.481012000 | 5.091911000  |
| H | 5.398379000 | 10.468709000 | 4.677173000  |
| C | 3.181480000 | 17.727119000 | 9.447615000  |
| H | 2.262232000 | 18.055697000 | 9.357811000  |
| H | 3.230008000 | 17.089157000 | 10.188608000 |
| H | 3.781572000 | 18.481606000 | 9.624783000  |
| C | 5.313254000 | 19.887776000 | 7.558092000  |
| H | 5.534724000 | 19.157855000 | 8.173566000  |
| H | 6.125181000 | 20.390484000 | 7.341081000  |
| H | 4.661283000 | 20.484875000 | 7.980693000  |
| C | 4.345647000 | 20.376255000 | 5.271974000  |
| H | 3.971254000 | 19.937759000 | 4.480221000  |
| H | 3.678094000 | 20.981725000 | 5.657195000  |
| H | 5.142008000 | 20.887313000 | 5.017561000  |
| C | 6.744525000 | 16.806914000 | 3.765370000  |
| H | 6.609903000 | 16.720751000 | 4.732993000  |
| H | 6.835698000 | 15.915612000 | 3.368502000  |
| H | 7.557681000 | 17.325857000 | 3.594310000  |
| C | 5.764179000 | 17.652124000 | 1.620568000  |
| H | 5.001984000 | 18.108456000 | 1.207266000  |
| H | 6.581790000 | 18.167905000 | 1.455708000  |
| H | 5.859807000 | 16.757640000 | 1.229899000  |
| C | 2.347557000 | 18.752722000 | 2.443388000  |
| H | 3.207969000 | 19.171030000 | 2.233193000  |
| H | 1.692061000 | 18.988691000 | 1.753769000  |
| H | 2.032755000 | 19.073861000 | 3.315098000  |
| C | 1.170718000 | 16.557607000 | 2.819469000  |
| H | 1.286412000 | 15.585393000 | 2.848074000  |
| H | 0.854618000 | 16.874652000 | 3.692137000  |
| H | 0.513908000 | 16.789483000 | 2.130807000  |

|    |              |              |              |
|----|--------------|--------------|--------------|
| C  | 0.567642000  | 17.597398000 | 6.603073000  |
| H  | 0.779390000  | 16.839749000 | 6.017709000  |
| H  | 0.557271000  | 17.297298000 | 7.535071000  |
| H  | -0.311609000 | 17.957940000 | 6.364729000  |
| C  | 1.280625000  | 19.861427000 | 7.350677000  |
| H  | 1.954976000  | 20.563944000 | 7.247221000  |
| H  | 0.398691000  | 20.216354000 | 7.112265000  |
| H  | 1.267573000  | 19.555712000 | 8.282584000  |
| C  | 5.670802000  | 11.484319000 | 9.315416000  |
| H  | 4.800760000  | 11.881588000 | 9.531629000  |
| H  | 5.932490000  | 10.864579000 | 10.027532000 |
| H  | 6.342190000  | 12.193181000 | 9.235026000  |
| C  | 6.913963000  | 10.106039000 | 7.646984000  |
| H  | 6.835586000  | 9.623681000  | 6.798248000  |
| H  | 7.589489000  | 10.810725000 | 7.562194000  |
| H  | 7.179806000  | 9.482124000  | 8.354700000  |
| C  | 4.232868000  | 9.031791000  | 5.130659000  |
| H  | 4.725391000  | 8.628319000  | 5.871060000  |
| H  | 3.267685000  | 8.875437000  | 5.258617000  |
| H  | 4.512781000  | 8.625117000  | 4.284909000  |
| C  | 3.696183000  | 11.074889000 | 3.927199000  |
| H  | 3.855941000  | 12.041428000 | 3.881819000  |
| H  | 3.985551000  | 10.657817000 | 3.088128000  |
| H  | 2.740438000  | 10.908157000 | 4.061836000  |
| Si | 1.975683000  | 12.404524000 | 7.510227000  |
| C  | -0.332044000 | 14.291552000 | 7.350677000  |
| H  | -0.211367000 | 14.455182000 | 8.310094000  |
| H  | -0.662879000 | 15.107697000 | 6.920326000  |
| H  | -0.979308000 | 13.568178000 | 7.221693000  |
| C  | 1.980173000  | 12.647750000 | 9.415705000  |
| H  | 2.607734000  | 11.962238000 | 9.784264000  |

|   |              |              |              |
|---|--------------|--------------|--------------|
| C | 1.016490000  | 13.892256000 | 6.726155000  |
| H | 1.614907000  | 14.689652000 | 6.810260000  |
| C | 2.540947000  | 14.019950000 | 9.839651000  |
| H | 3.393813000  | 14.179668000 | 9.385345000  |
| H | 1.903018000  | 14.722954000 | 9.593694000  |
| H | 2.679361000  | 14.030003000 | 10.809507000 |
| C | 0.637098000  | 12.459250000 | 10.165588000 |
| H | 0.245703000  | 11.595230000 | 9.922571000  |
| H | 0.796784000  | 12.486674000 | 11.131980000 |
| H | 0.020440000  | 13.179604000 | 9.916189000  |
| C | 0.853296000  | 13.628761000 | 5.203596000  |
| H | 1.718704000  | 13.375523000 | 4.821246000  |
| H | 0.209863000  | 12.901881000 | 5.066474000  |
| H | 0.526293000  | 14.441399000 | 4.765108000  |
| C | 1.892052000  | 9.718904000  | 7.954686000  |
| H | 2.868317000  | 9.776609000  | 7.900417000  |
| H | 1.607147000  | 9.859367000  | 8.882102000  |
| H | 1.599319000  | 8.833197000  | 7.654095000  |
| C | 1.265101000  | 10.795179000 | 7.061209000  |
| H | 1.538078000  | 10.598064000 | 6.118248000  |
| C | -0.272391000 | 10.734372000 | 7.120470000  |
| H | -0.648986000 | 11.429857000 | 6.541373000  |
| H | -0.577049000 | 9.854624000  | 6.814431000  |
| H | -0.569205000 | 10.880794000 | 8.042439000  |

**1<sup>+</sup>** (opt)

|    |              |              |              |
|----|--------------|--------------|--------------|
| Dy | 30.353718818 | 29.946419398 | 29.865537104 |
| N  | 29.717265212 | 31.904320363 | 29.112634796 |
| N  | 29.638011491 | 28.028626088 | 30.603733023 |
| C  | 32.380819436 | 28.147917937 | 29.614005675 |
| C  | 32.878600870 | 29.066294881 | 30.494335286 |
| H  | 32.342602170 | 29.165777949 | 31.460785179 |

|    |              |              |              |
|----|--------------|--------------|--------------|
| Si | 30.074891814 | 31.801312251 | 27.435951517 |
| Si | 29.522878499 | 33.129297195 | 30.321234934 |
| Si | 30.952850091 | 26.960387648 | 30.240468774 |
| C  | 29.853622319 | 32.061232137 | 31.886680134 |
| H  | 29.237114567 | 31.129111046 | 31.725334472 |
| C  | 30.318698599 | 29.888173304 | 27.209421355 |
| H  | 31.269918707 | 29.511756049 | 27.670378844 |
| H  | 29.474535207 | 29.312116312 | 27.673463395 |
| C  | 30.371380631 | 29.462532293 | 25.735763730 |
| H  | 30.514722206 | 28.374653960 | 25.615808292 |
| H  | 29.434726337 | 29.732333856 | 25.219872782 |
| H  | 31.196536269 | 29.966995014 | 25.207443877 |
| C  | 31.337288617 | 31.687197930 | 31.992860044 |
| H  | 31.854274060 | 31.493475086 | 31.019273150 |
| H  | 31.911788870 | 32.545927150 | 32.384389270 |
| H  | 31.528686792 | 30.842740013 | 32.685355338 |
| C  | 30.840765499 | 34.491686014 | 30.183126458 |
| H  | 31.757586911 | 33.954257336 | 29.852273691 |
| C  | 33.129851418 | 27.815588689 | 28.354101253 |
| H  | 32.461035366 | 27.538562732 | 27.521324283 |
| H  | 33.796991331 | 28.629329038 | 28.018706116 |
| H  | 33.776675517 | 26.934566937 | 28.536382745 |
| C  | 34.158947901 | 29.834677197 | 30.416236968 |
| H  | 34.090425928 | 30.802858976 | 30.940679118 |
| H  | 34.968386370 | 29.265061761 | 30.912913947 |
| H  | 34.483162083 | 30.019565824 | 29.378997822 |
| C  | 31.733860184 | 32.620629585 | 27.012066622 |
| H  | 31.639405309 | 33.644856407 | 27.430362858 |
| C  | 28.705091482 | 32.326824920 | 26.250839069 |
| H  | 29.059356922 | 32.038366822 | 25.237813168 |
| C  | 27.775984136 | 33.849067154 | 30.322868854 |

|   |              |              |              |
|---|--------------|--------------|--------------|
| H | 27.669321223 | 34.253567938 | 29.291640339 |
| C | 31.737425085 | 26.069420568 | 31.722593523 |
| H | 30.992757305 | 25.284068940 | 31.976756707 |
| C | 30.701969447 | 25.715717724 | 28.828964427 |
| H | 31.731519106 | 25.573175400 | 28.434634599 |
| C | 29.361068423 | 32.589165324 | 33.236783707 |
| H | 28.266901159 | 32.722518036 | 33.244595941 |
| H | 29.620995868 | 31.900097454 | 34.061927610 |
| H | 29.817954251 | 33.568482063 | 33.462317125 |
| C | 31.166374422 | 35.220189090 | 31.492967523 |
| H | 31.527944373 | 34.546323205 | 32.289448807 |
| H | 31.953883531 | 35.979869390 | 31.329340868 |
| H | 30.286429391 | 35.752199120 | 31.895767292 |
| C | 30.475431962 | 35.511340611 | 29.096306667 |
| H | 30.226251438 | 35.042519050 | 28.128231005 |
| H | 29.598858597 | 36.115027398 | 29.394324236 |
| H | 31.308020194 | 36.217684512 | 28.918540970 |
| C | 32.878905701 | 31.928098791 | 27.754304376 |
| H | 32.669250704 | 31.830416484 | 28.840718484 |
| H | 33.067030551 | 30.913464277 | 27.350624581 |
| H | 33.829266472 | 32.487428051 | 27.667388601 |
| C | 32.037117433 | 32.751818239 | 25.516503704 |
| H | 31.218641801 | 33.244515464 | 24.963398459 |
| H | 32.954331902 | 33.345819080 | 25.347331222 |
| H | 32.206008128 | 31.767555433 | 25.043306643 |
| C | 28.497383198 | 33.844499247 | 26.263800158 |
| H | 29.414280697 | 34.403424803 | 26.004249321 |
| H | 27.715227925 | 34.139359867 | 25.539831517 |
| H | 28.162473070 | 34.193447789 | 27.258419442 |
| C | 27.395999946 | 31.592905578 | 26.543980789 |
| H | 27.499779555 | 30.494254379 | 26.482059220 |

|    |              |              |              |
|----|--------------|--------------|--------------|
| H  | 27.036662276 | 31.834125887 | 27.561727427 |
| H  | 26.602955813 | 31.891120038 | 25.833343251 |
| C  | 26.721610492 | 32.755899086 | 30.499082262 |
| H  | 26.849619579 | 31.944056415 | 29.760229338 |
| H  | 26.771930667 | 32.297493616 | 31.505572617 |
| H  | 25.698637468 | 33.161122281 | 30.384259900 |
| C  | 27.552108738 | 35.008471548 | 31.299499011 |
| H  | 28.236541922 | 35.853564338 | 31.113267240 |
| H  | 26.520582459 | 35.397662694 | 31.210369084 |
| H  | 27.689295407 | 34.698672244 | 32.350658859 |
| C  | 31.943567156 | 26.936885478 | 32.962712156 |
| H  | 31.044360689 | 27.521305548 | 33.226407718 |
| H  | 32.211107584 | 26.315028558 | 33.836954697 |
| H  | 32.784125123 | 27.642413254 | 32.820023201 |
| C  | 33.042824843 | 25.374501314 | 31.318689655 |
| H  | 32.922777901 | 24.701132696 | 30.451361215 |
| H  | 33.821167134 | 26.118837659 | 31.063022783 |
| H  | 33.440564162 | 24.767813375 | 32.152957614 |
| C  | 30.196564209 | 24.331773846 | 29.249244127 |
| H  | 30.782161118 | 23.893416200 | 30.075854701 |
| H  | 29.142738744 | 24.364869803 | 29.571506885 |
| H  | 30.251710497 | 23.630695679 | 28.395981561 |
| C  | 29.840722238 | 26.282192322 | 27.699705825 |
| H  | 30.228004297 | 27.242140044 | 27.314365778 |
| H  | 29.785939493 | 25.579193056 | 26.847785426 |
| H  | 28.806696367 | 26.469521766 | 28.043775568 |
| Si | 28.050250358 | 27.758080831 | 31.310491441 |
| C  | 25.747056099 | 29.562248154 | 31.250468430 |
| H  | 25.926997016 | 29.914614216 | 32.280316268 |
| H  | 25.219525168 | 30.370262778 | 30.709834387 |
| H  | 25.055709970 | 28.703388921 | 31.311240230 |

|                       |              |              |              |
|-----------------------|--------------|--------------|--------------|
| C                     | 28.188358720 | 27.899379918 | 33.200143301 |
| H                     | 28.913753236 | 27.098225402 | 33.464127538 |
| C                     | 27.044979135 | 29.180818865 | 30.537913538 |
| H                     | 27.717534285 | 30.079071083 | 30.616849795 |
| C                     | 28.784219836 | 29.234720013 | 33.638290559 |
| H                     | 29.755775147 | 29.433994854 | 33.144307453 |
| H                     | 28.104179085 | 30.075083619 | 33.400103554 |
| H                     | 28.961057207 | 29.264817368 | 34.730549796 |
| C                     | 26.891390624 | 27.615720612 | 33.967955322 |
| H                     | 26.456748018 | 26.632621673 | 33.721697773 |
| H                     | 27.075667055 | 27.628118660 | 35.058882272 |
| H                     | 26.116857864 | 28.374896296 | 33.762785048 |
| C                     | 26.794927838 | 28.933170989 | 29.047175507 |
| H                     | 27.712469816 | 28.631598878 | 28.504431754 |
| H                     | 26.063623653 | 28.118989091 | 28.897747521 |
| H                     | 26.388817644 | 29.832733801 | 28.550061838 |
| C                     | 27.912270612 | 24.956245198 | 31.760177746 |
| H                     | 29.016099336 | 24.964658660 | 31.792171392 |
| H                     | 27.558254868 | 25.055942035 | 32.801771387 |
| H                     | 27.603780907 | 23.953341206 | 31.409087207 |
| C                     | 27.328097972 | 26.058258449 | 30.866938497 |
| H                     | 27.664423136 | 25.875458653 | 29.822698892 |
| C                     | 25.795800247 | 25.974949600 | 30.876660087 |
| H                     | 25.321934077 | 26.664496220 | 30.157910605 |
| H                     | 25.467011568 | 24.951834053 | 30.613251944 |
| H                     | 25.374779695 | 26.198769982 | 31.873047436 |
| <b>1<sub>ci</sub></b> |              |              |              |
| H                     | 28.830635053 | 31.751365363 | 28.259986045 |
| H                     | 27.713981215 | 30.690344970 | 29.245018540 |
| H                     | 32.519930162 | 29.668353951 | 33.923275822 |
| H                     | 33.744665191 | 29.377794434 | 32.654325655 |

|   |              |              |              |
|---|--------------|--------------|--------------|
| H | 33.665565284 | 30.957667106 | 33.476452926 |
| H | 28.714453212 | 29.501569339 | 32.808530117 |
| H | 30.085242105 | 28.808317779 | 33.702121152 |
| H | 28.560362476 | 29.136614469 | 34.539428178 |
| H | 32.098455147 | 31.755135470 | 30.141704902 |
| H | 33.403033136 | 32.131317187 | 31.108186755 |
| H | 33.430445412 | 30.524530275 | 30.346255793 |
| H | 28.839955229 | 31.600468688 | 34.182048749 |
| H | 33.213472290 | 33.458503267 | 32.207445035 |
| H | 31.815661851 | 34.454282485 | 31.685733319 |
| H | 32.824669253 | 34.956837317 | 33.057286483 |
| H | 29.280587348 | 34.920196375 | 31.027496629 |
| H | 30.871744423 | 31.981406502 | 35.664402955 |
| H | 29.851660704 | 30.655057679 | 36.270930796 |
| H | 31.367925342 | 30.307717503 | 35.414651543 |
| H | 28.125138386 | 29.022769507 | 30.038678822 |
| H | 26.820491230 | 28.046672756 | 30.670665012 |
| H | 28.316039759 | 28.180400810 | 31.603349831 |
| H | 31.516968797 | 29.743450858 | 31.677520939 |
| H | 28.178541046 | 29.047098940 | 27.319150886 |
| H | 28.368812883 | 30.227458248 | 26.003943186 |
| H | 27.612971652 | 28.666708588 | 25.674066393 |
| H | 30.923025930 | 28.245621652 | 31.477373375 |
| H | 26.136487894 | 33.426534837 | 30.960964470 |
| H | 32.558829387 | 27.324004553 | 26.055085043 |
| H | 29.720036108 | 33.735534487 | 34.826381563 |
| H | 30.839346919 | 35.101071547 | 34.574621219 |
| H | 29.753249073 | 34.683195025 | 33.305389802 |
| H | 33.013634019 | 30.529159893 | 28.554013296 |
| H | 30.850626300 | 33.844398377 | 29.307651095 |
| H | 29.734864075 | 34.313105783 | 27.984833051 |

|   |              |              |              |
|---|--------------|--------------|--------------|
| H | 30.465463052 | 35.550362506 | 29.022901991 |
| H | 33.998807043 | 32.711540536 | 28.719401850 |
| H | 33.616468263 | 32.887520647 | 26.991816247 |
| H | 32.489645439 | 33.485260727 | 28.198257804 |
| H | 26.608571985 | 31.729904010 | 27.284299037 |
| H | 25.895356003 | 32.404995172 | 28.771683438 |
| H | 27.052079741 | 33.363452107 | 27.852815778 |
| H | 27.505411307 | 34.748042914 | 32.689195420 |
| H | 26.055067868 | 33.963250940 | 33.388268972 |
| H | 27.659242776 | 33.271972309 | 33.644989972 |
| H | 26.080725456 | 30.865874112 | 31.101299773 |
| H | 26.836744222 | 30.964932238 | 32.703530855 |
| H | 25.218422687 | 31.643263448 | 32.450120627 |
| H | 26.982683125 | 35.461811385 | 30.473948161 |
| H | 28.171291902 | 36.479806136 | 29.716266282 |
| H | 27.274583631 | 35.269062892 | 28.719414846 |
| H | 28.036544683 | 26.800486298 | 28.858593538 |
| H | 33.117345635 | 27.820382379 | 30.219670936 |
| H | 33.267481432 | 27.628374568 | 31.986448673 |
| H | 33.179501106 | 26.212657281 | 30.944836749 |
| H | 29.721628849 | 26.357550107 | 32.535009856 |
| H | 31.123711677 | 25.304654754 | 32.312376711 |
| H | 31.226631771 | 26.743832420 | 33.360821912 |
| H | 30.024939242 | 31.549086677 | 25.652923412 |
| H | 30.531011649 | 32.855795308 | 26.762470433 |
| H | 31.658023525 | 32.248221285 | 25.560200596 |
| H | 28.537452997 | 24.662068501 | 30.196600230 |
| H | 28.478179674 | 25.572027482 | 31.671068435 |
| H | 27.014132047 | 25.430405239 | 30.691779836 |
| H | 32.079984413 | 32.858505643 | 34.300945167 |
| H | 30.988150590 | 28.372243638 | 23.995503185 |

|   |              |              |              |
|---|--------------|--------------|--------------|
| H | 29.236623129 | 28.290887075 | 23.777656168 |
| H | 30.013781548 | 29.844723711 | 24.090311763 |
| H | 33.497394229 | 27.584098063 | 28.383098828 |
| H | 34.795314109 | 27.700930259 | 27.163103218 |
| H | 34.179825176 | 29.157729049 | 27.937911591 |
| H | 29.751582824 | 27.462224741 | 26.053154418 |
| H | 32.664515114 | 29.317236256 | 24.445496286 |
| H | 33.660320304 | 30.187931520 | 25.610623995 |
| H | 34.279271493 | 28.713612716 | 24.848508937 |
| H | 32.212102831 | 24.667581863 | 30.303872021 |
| H | 30.549132445 | 24.109421972 | 30.373410625 |
| H | 31.651132300 | 23.414198549 | 29.171025863 |
| H | 31.740205332 | 25.658443888 | 27.974719076 |
| H | 29.292474439 | 25.424558480 | 27.074413699 |
| H | 30.076756384 | 23.834345157 | 27.357065157 |
| H | 28.930433426 | 24.489908660 | 28.507733550 |
| C | 27.981275082 | 31.752729412 | 28.999816341 |
| C | 33.054708481 | 30.128933564 | 33.079328645 |
| C | 29.250476193 | 29.532001263 | 33.771324467 |
| C | 32.785016385 | 31.254580372 | 30.863514387 |
| C | 29.731223679 | 30.940104854 | 34.098331266 |
| C | 32.375660205 | 34.079417794 | 32.560479739 |
| C | 28.891873716 | 34.489569801 | 30.058262591 |
| C | 30.488696869 | 30.976820127 | 35.429232164 |
| C | 27.920958929 | 28.071595002 | 30.579372400 |
| C | 31.424998068 | 30.922593232 | 27.224561102 |
| C | 32.061839092 | 30.648328825 | 32.050097006 |
| C | 28.425676648 | 29.148978122 | 26.247623763 |
| C | 31.249526751 | 27.211896480 | 31.223158431 |
| C | 26.828547554 | 32.884337968 | 31.641800736 |
| C | 32.808247542 | 28.336203992 | 26.442916520 |

|    |              |              |              |
|----|--------------|--------------|--------------|
| C  | 30.385776319 | 34.220434761 | 34.089084705 |
| C  | 32.519902087 | 31.310082811 | 27.962512374 |
| C  | 30.028383852 | 34.536192727 | 29.035774885 |
| C  | 33.181877394 | 32.647534389 | 27.980739024 |
| C  | 26.822010695 | 32.337861295 | 28.180669009 |
| C  | 27.022853188 | 33.764889207 | 32.889343605 |
| C  | 26.213302373 | 31.524325590 | 31.981878221 |
| C  | 27.762496743 | 35.455937627 | 29.697359119 |
| C  | 28.495302046 | 26.851016775 | 29.868870109 |
| C  | 32.774116450 | 27.229297967 | 31.084811351 |
| C  | 30.812722040 | 26.357850588 | 32.411831720 |
| C  | 30.862427623 | 31.930193746 | 26.258163843 |
| C  | 28.107817368 | 25.573540414 | 30.635634904 |
| C  | 31.451323880 | 33.298358881 | 33.491793840 |
| C  | 30.034506474 | 28.774844509 | 24.371350754 |
| C  | 33.868061439 | 28.176021099 | 27.533475209 |
| C  | 29.792862420 | 28.562432685 | 25.875302991 |
| C  | 33.369203563 | 29.173571730 | 25.279508817 |
| C  | 31.365359328 | 24.358331464 | 29.672523949 |
| C  | 30.895899924 | 25.415990482 | 28.653542092 |
| C  | 29.756178494 | 24.777777000 | 27.837482803 |
| N  | 29.718060305 | 31.878815922 | 31.264267725 |
| N  | 30.681783285 | 28.556046457 | 28.740612291 |
| Dy | 30.195542411 | 30.572500154 | 29.600218874 |
| Si | 28.398485826 | 32.792811221 | 30.614814151 |
| Si | 30.368732893 | 27.024967452 | 29.546904713 |
| Si | 30.679431282 | 31.778905172 | 32.703497984 |
| Si | 31.148735308 | 29.013696166 | 27.125497440 |
| Cl | 29.069431839 | 36.809221719 | 32.472223505 |

**1**<sub>Al(OCF<sub>3</sub>)<sub>4</sub></sub>

|    |              |              |              |
|----|--------------|--------------|--------------|
| Dy | 13.262188754 | 14.766779752 | 14.988239390 |
|----|--------------|--------------|--------------|

|   |              |              |              |
|---|--------------|--------------|--------------|
| N | 12.604975499 | 16.758161904 | 14.267904167 |
| N | 12.527299549 | 12.856512631 | 15.762122738 |
| C | 15.291186646 | 13.036422253 | 14.768291637 |
| C | 15.785708450 | 13.949968857 | 15.656712013 |
| C | 12.692125943 | 16.936172061 | 17.071010306 |
| C | 13.168692009 | 14.782286189 | 12.294198206 |
| C | 13.178129099 | 14.346458075 | 10.818658161 |
| C | 14.177013153 | 16.564322955 | 17.220203501 |
| C | 13.673412503 | 19.381053991 | 15.346167033 |
| C | 16.035230840 | 12.715548312 | 13.501040754 |
| C | 17.066988198 | 14.718383820 | 15.601282351 |
| C | 14.579836430 | 17.537297808 | 12.133280517 |
| C | 11.541250129 | 17.236000550 | 11.401234387 |
| C | 10.612558157 | 18.683212976 | 15.440018309 |
| C | 14.675954348 | 10.936794459 | 16.902508404 |
| C | 13.654350056 | 10.557512878 | 13.991538262 |
| C | 12.159678187 | 17.484700526 | 18.402009071 |
| C | 13.992696830 | 20.120734684 | 16.655705439 |
| C | 13.305050566 | 20.399426053 | 14.253673144 |
| C | 15.738213407 | 16.885440910 | 12.899367343 |
| C | 14.897793457 | 17.629271448 | 10.633224735 |
| C | 11.334416026 | 18.756978020 | 11.372088716 |
| C | 10.220556828 | 16.510337792 | 11.681799395 |
| C | 9.549846019  | 17.591875089 | 15.612009899 |
| C | 10.340209542 | 19.865962509 | 16.382104595 |
| C | 14.869582560 | 11.799751937 | 18.153797035 |
| C | 15.998091642 | 10.259399051 | 16.505545373 |
| C | 13.191323194 | 9.150497796  | 14.397616488 |
| C | 12.782992594 | 11.099311843 | 12.852864006 |
| C | 8.566273146  | 14.276781320 | 16.427868264 |
| C | 11.063839432 | 12.665756334 | 18.373760160 |

|   |              |              |              |
|---|--------------|--------------|--------------|
| C | 9.880759296  | 13.938465259 | 15.713894755 |
| C | 11.609227035 | 14.017514300 | 18.840009746 |
| C | 9.777174224  | 12.324981524 | 19.144049509 |
| C | 9.637140695  | 13.710524416 | 14.214124766 |
| C | 10.850937662 | 9.707750685  | 16.908963887 |
| C | 10.261165217 | 10.813115128 | 16.017012629 |
| C | 8.726843505  | 10.696874248 | 16.008663478 |
| C | 23.459935768 | 11.816372915 | 12.597671999 |
| C | 20.772312029 | 12.873079879 | 16.320883789 |
| C | 19.797092561 | 15.068185492 | 12.286220418 |
| C | 19.297396728 | 10.479636328 | 12.915516032 |
| H | 15.242562480 | 14.050517705 | 16.614091838 |
| H | 12.098873402 | 16.001882825 | 16.901034093 |
| H | 14.130339408 | 14.414967480 | 12.721161258 |
| H | 12.346996639 | 14.204612801 | 12.780176702 |
| H | 13.312569668 | 13.261497432 | 10.712036092 |
| H | 12.234897308 | 14.616820571 | 10.327467478 |
| H | 13.992237217 | 14.836958924 | 10.272250223 |
| H | 14.706019307 | 16.364569365 | 16.264228751 |
| H | 14.741729169 | 17.412463620 | 17.630885594 |
| H | 14.341972525 | 15.715390053 | 17.904232978 |
| H | 14.596898022 | 18.866257055 | 15.021679823 |
| H | 15.364850932 | 12.441224467 | 12.675947608 |
| H | 16.696695117 | 13.525381114 | 13.169234357 |
| H | 16.688172488 | 11.844054727 | 13.669135429 |
| H | 16.972990345 | 15.707559865 | 16.070699537 |
| H | 17.840070190 | 14.172583428 | 16.167841966 |
| H | 17.452749639 | 14.840522505 | 14.583140083 |
| H | 14.468966120 | 18.567731331 | 12.513201655 |
| H | 11.897413676 | 16.931571729 | 10.399841580 |
| H | 10.525000724 | 19.063436045 | 14.404588003 |

|   |              |              |              |
|---|--------------|--------------|--------------|
| H | 13.946113558 | 10.144353143 | 17.152669816 |
| H | 14.681604606 | 10.445917892 | 13.600996389 |
| H | 11.070276681 | 17.612287523 | 18.379425538 |
| H | 12.399352633 | 16.810340950 | 19.238666492 |
| H | 12.606649956 | 18.463087912 | 18.625392619 |
| H | 14.378590497 | 19.456477520 | 17.440302258 |
| H | 14.759101272 | 20.892941523 | 16.482204676 |
| H | 13.108515093 | 20.630626669 | 17.063700121 |
| H | 13.058832573 | 19.927211768 | 13.293984018 |
| H | 12.434662336 | 21.003204522 | 14.548918497 |
| H | 14.137955807 | 21.097566253 | 14.073988273 |
| H | 15.531731636 | 16.817120263 | 13.981285788 |
| H | 15.953509753 | 15.873793410 | 12.525428384 |
| H | 16.674669248 | 17.453098387 | 12.792770752 |
| H | 14.081552997 | 18.089517191 | 10.058819185 |
| H | 15.803271183 | 18.231914363 | 10.464330831 |
| H | 15.095081883 | 16.639238049 | 10.198182829 |
| H | 12.255894297 | 19.301655888 | 11.122046756 |
| H | 10.574716244 | 19.030785921 | 10.623114135 |
| H | 10.978293001 | 19.131529352 | 12.342910812 |
| H | 10.322058035 | 15.416212018 | 11.634851032 |
| H | 9.839786498  | 16.763034975 | 12.681912952 |
| H | 9.447587029  | 16.800248925 | 10.952292526 |
| H | 9.700904170  | 16.762179925 | 14.908456551 |
| H | 9.562443035  | 17.170844777 | 16.629116919 |
| H | 8.537673169  | 17.993982169 | 15.445608749 |
| H | 11.026545323 | 20.705553620 | 16.212647937 |
| H | 9.316329481  | 20.245134859 | 16.234999122 |
| H | 10.426656390 | 19.577810481 | 17.439246405 |
| H | 13.968801975 | 12.367864934 | 18.423038693 |
| H | 15.138746625 | 11.170602765 | 19.016470129 |

|   |              |              |              |
|---|--------------|--------------|--------------|
| H | 15.699782524 | 12.509563358 | 18.020836107 |
| H | 15.901413356 | 9.604984575  | 15.628701484 |
| H | 16.774010009 | 11.004062749 | 16.275190021 |
| H | 16.380858680 | 9.643889412  | 17.333856489 |
| H | 13.781571115 | 8.730961551  | 15.223229256 |
| H | 12.137148781 | 9.138147981  | 14.699372576 |
| H | 13.291515079 | 8.463493892  | 13.542851985 |
| H | 13.155076274 | 12.056031190 | 12.463134909 |
| H | 12.754747325 | 10.392150415 | 12.008826683 |
| H | 11.746253604 | 11.261958191 | 13.183000064 |
| H | 8.732167294  | 14.620874802 | 17.457079379 |
| H | 8.026481570  | 15.075747879 | 15.895806989 |
| H | 7.897752396  | 13.406118956 | 16.473437735 |
| H | 11.814002867 | 11.895936735 | 18.633715263 |
| H | 10.522437665 | 14.844929931 | 15.805163592 |
| H | 12.573760851 | 14.254788388 | 18.366793327 |
| H | 10.907841144 | 14.834099504 | 18.610097919 |
| H | 11.770598910 | 14.030077994 | 19.930228913 |
| H | 9.381325454  | 11.333714824 | 18.890481313 |
| H | 9.968306069  | 12.332382251 | 20.229500818 |
| H | 8.979862399  | 13.055536406 | 18.952349887 |
| H | 10.556483439 | 13.435030089 | 13.673421751 |
| H | 8.921337356  | 12.893421465 | 14.049303020 |
| H | 9.221013342  | 14.609318155 | 13.735040581 |
| H | 11.946582681 | 9.742286350  | 16.968906033 |
| H | 10.466916266 | 9.779779248  | 17.936043801 |
| H | 10.576385213 | 8.709926200  | 16.531241697 |
| H | 10.607453636 | 10.637343054 | 14.982694588 |
| H | 8.251315846  | 11.382596348 | 15.295956141 |
| H | 8.425116343  | 9.674530300  | 15.729168682 |
| H | 8.295043769  | 10.899052219 | 16.999132075 |

|    |              |              |              |
|----|--------------|--------------|--------------|
| Si | 12.931599321 | 16.693819663 | 12.576368833 |
| Si | 12.379991080 | 17.978345098 | 15.476599532 |
| Si | 13.884405719 | 11.816477003 | 15.407112976 |
| Si | 10.948707542 | 12.539136318 | 16.469303646 |
| Al | 20.901870394 | 12.738437190 | 13.490137636 |
| O  | 22.271143749 | 12.347494609 | 12.492339643 |
| O  | 21.334651861 | 12.603434649 | 15.186391494 |
| O  | 20.381623810 | 14.405419123 | 13.230533421 |
| O  | 19.488714947 | 11.755208298 | 13.089908768 |
| F  | 24.318836868 | 12.547148489 | 13.397100556 |
| F  | 24.075075968 | 11.713326862 | 11.374102661 |
| F  | 23.448623222 | 10.541130577 | 13.129978706 |
| F  | 19.457677054 | 12.390308068 | 16.423192255 |
| F  | 20.660814799 | 14.230979239 | 16.585101713 |
| F  | 21.444116316 | 12.332239903 | 17.383867729 |
| F  | 20.086673955 | 14.635045368 | 11.010342427 |
| F  | 20.091547253 | 16.411673416 | 12.319375730 |
| F  | 18.391111550 | 15.011255303 | 12.371908291 |
| F  | 19.195342812 | 10.119454813 | 11.590100126 |
| F  | 18.103325900 | 10.053433999 | 13.499599074 |
| F  | 20.279117329 | 9.680217506  | 13.458256818 |

#### INCAR:

#### References-

1. T. D. Kühne, M. Iannuzzi, M. Del Ben, V. V. Rybkin, P. Seewald, F. Stein, T. Laino, R. Z. Khaliullin, O. Schütt and F. Schiffmann, *J. Chem. Phys.*, 2020, **152**, 194103.
2. J. Hafner, *J. Comput. Chem.*, 2008, **29**, 2044-2078.
3. A. E. Mattsson, R. Armiento, P. A. Schultz and T. R. Mattsson, *Phys. Rev. B Condens.*, 2006, **73**, 195123.
4. E. Caldeweyher, C. Bannwarth and S. Grimme, *Chem. Phys*, 2017, **147**.
5. F. Aquilante, J. Autschbach, R. K. Carlson, L. F. Chibotaru, M. G. Delcey, L. De Vico, I. Fdez. Galván, N. Ferré, L. M. Frutos and L. Gagliardi, *Journal*, 2016.
6. J. Emerson-King, G. K. Gransbury, B. E. Atkinson, W. J. Blackmore, G. F. Whitehead, N. F. Chilton and D. P. Mills, *Nature*, 2025, 1-5.
7. B. O. Roos, P. Linse, P. E. Siegbahn and M. R. Blomberg, *Chem. Phys.*, 1982, **66**, 197-207.
